# Supplementary material
Source: PubMed Central journal article supplement (PMC7060120)

## Supplementary Materials

### Experiment 1 Additional Analyses

**Age analyses.** Although the Age x Test Trial interaction was not significant, separate 4 (Test Trial) x 2 (Condition) mixed-model ANOVAs were conducted for each age group to confirm that both groups failed to form a superordinate category (see Supplementary Figure 1). A significant effect of Test Trial was found for the 14-month-olds,  $F(3, 138) = 13.65, p < .001, \eta_p^2 = .23$ . Fourteen-month-olds attended significantly less to the *negative familiar event* compared to the *negative novel face* ( $p < .001, d = .77$ ), the *negative novel emotion* ( $p < .001, d = .62$ ), and the *positive novel emotion* ( $p < .001, d = .99$ ). Infants at this age also looked significantly longer at the *positive novel emotion* compared to the *negative novel face* ( $p = .022, d = .34$ ) and marginally longer to the *negative novel emotion* ( $p = .067, d = .27$ ). A significant effect of Test Trial was also found for the 18-month-olds,  $F(3, 138) = 18.50, p < .001, \eta_p^2 = .29$ . Eighteen-month-olds attended significantly less to the *negative familiar event* compared to the *negative novel face* ( $p < .001, d = .90$ ), the *negative novel emotion* ( $p < .001, d = .97$ ), and the *positive novel emotion* ( $p < .001, d = 1.12$ ). There were no other significant comparisons for either age (see Supplementary Table 1 for cell means).

**Did 14-month-old infants track the habituation events in the Disgust-Sad condition?** A repeated measures ANOVA confirmed a significant effect of Test Trial for the 14-month-olds in the *Disgust-Sad* condition,  $F(3, 69) = 5.71, p < .001, \eta_p^2 = .20$ . Much like the overall sample, these infants attended significantly less to the *negative familiar event* compared to the *negative novel face* ( $p = .003, d = .68$ ), the *negative novel emotion* ( $p = .013, d = .55$ ), and the *positive novel emotion* ( $p < .001, d = .87$ ). This

suggests that the 14-month-olds in the *Disgust-Sad* condition were able to track which event they had seen during habituation, despite being unable to form a superordinate category (see Supplementary Table 1 for cell means).

### **Experiment 2 Additional Analyses**

**Age analyses.** Although the Age x Trial x Condition interaction was not significant, separate repeated-measures ANOVAs were conducted for each age group to confirm that both groups formed a superordinate category in the *Disgust-Sad* condition (see Supplementary Figure 2). A significant effect of Test Trial emerged for the 14-month-olds,  $F(3, 93) = 14.42$ ,  $p < .001$ ,  $\eta_p^2 = .32$ , and the 18-month-olds,  $F(3, 93) = 5.00$ ,  $p = .003$ ,  $\eta_p^2 = .14$ . Similar to the overall sample, paired t-tests revealed that 14-month-olds looked significantly longer at the *positive novel emotion* compared to the *negative familiar event* ( $p < .001$ ,  $d = 1.09$ ), the *negative novel face* ( $p < .001$ ,  $d = .85$ ), and the *negative novel emotion* ( $p < .001$ ,  $d = .86$ ). Infants' looking to the *negative familiar event* did not differ from the *negative novel face* ( $p > .25$ ,  $d = .12$ ) or the *negative novel emotion* ( $p > .25$ ,  $d = .03$ ) and looking to the *negative novel face* did not differ from the *negative novel emotion* ( $p > .25$ ,  $d = .16$ ). Similar results were found for the 18-month-olds. Paired t-tests revealed that 18-month-olds looked significantly longer at the *positive novel emotion* compared to the *negative familiar event* ( $p = .002$ ,  $d = .61$ ), the *negative novel face* ( $p = .040$ ,  $d = .38$ ), and the *negative novel emotion* ( $p = .022$ ,  $d = .43$ ). Infants' looking to the *negative familiar event* did not differ from the *negative novel face* ( $p = .13$ ,  $d = .27$ ) or the *negative novel emotion* ( $p = .14$ ,  $d = .27$ ), and looking to the *negative novel face* did not differ from the *negative novel emotion* ( $p > .25$ ,  $d = .03$ ) (see Supplementary Table 1 for cell means).

**Analyses to equate the sample size of experiment 1 with experiment 2.** In order to compare the results of Experiment 1 and 2 with the same sample size we also ran a

supplementary analysis in which we used only the first 24 infants tested in each age/condition in Experiment 2, thereby equating the sample size with Experiment 1. The results were the same as when the full  $N$  was tested (as reported in the main text). For completeness, the analyses with the reduced  $N$  are provided below (see Supplementary Table 1 for cell means).

**Habituation phase.** A 2 (Age) x 2 (Condition) x 2 (Trials) mixed-model ANOVA was conducted. A significant main effect of Trials,  $F(1, 92) = 405.70, p < .001, \eta_p^2 = .82$ , revealed that infants looked significantly longer to the first three habituation trials ( $M = 24.57s, SD = 4.83s$ ) compared to the *negative familiar event* ( $M = 10.23s, SD = 6.59s$ ). There were no other significant effects. Thus, infants did not reach the habituation criteria by chance.

**Test phase.** Infants' looking times during the test trials were analyzed in a 4 (Test Trial) x 2 (Age) x 2 (Condition) mixed-model ANOVA. Significant main effects of Test Trial,  $F(3, 276) = 21.96, p < .001, \eta_p^2 = .19$ , and Condition,  $F(1, 92) = 7.78, p = .006, \eta_p^2 = .08$ , were qualified by a significant Test Trial x Condition interaction,  $F(3, 276) = 6.13, p < .001, \eta_p^2 = .06$ . There were no other significant main effects or interactions (see Supplementary Figure 3).

Follow-up analyses were conducted separately by Condition. For the *Anger-Sad* condition, a significant main effect of Test Trial emerged,  $F(3, 138) = 14.87, p < .001, \eta_p^2 = .24$ . Follow-up comparisons revealed that infants looked significantly less at the *negative familiar event* compared to the *negative novel face* ( $p < .001, d = .58$ ), the *negative novel emotion* ( $p < .001, d = .75$ ), and the *positive novel emotion* ( $p < .001, d = .80$ ). There were no other significant effects. Thus, as in Experiment 1, infants did not form a superordinate category of negative valence in the *Anger-Sad* condition.

For the *Disgust-Sad* condition, a significant main effect of Test Trial also emerged,  $F(3, 138) = 13.08, p < .001, \eta_p^2 = .22$ . Follow-up comparisons between the test trials revealed that

infants looked significantly more at the *positive novel emotion* compared to the *negative familiar event* ( $p < .001$ ,  $d = .81$ ), the *negative novel face* ( $p < .001$ ,  $d = .67$ ), and the *negative novel emotion* ( $p < .001$ ,  $d = .57$ ). Critically, however, infants' looking to the *negative familiar event* did not differ from the *negative novel face* ( $p > .25$ ,  $d = .12$ ) or the *negative novel emotion* ( $p > .25$ ,  $d = .16$ ), and looking to the *negative novel face* did not differ from the *negative novel emotion* ( $p > .25$ ,  $d = .04$ ). Thus, infants formed a superordinate category of negative valence in the *Disgust-Sad* condition (see Supplementary Table 1 for cell means).

**Exploratory vocabulary analyses.** A secondary aim of Experiment 2 was to explore whether infants' vocabulary size was related to their looking times during the test trials. Preliminary analyses indicated that 18-month-olds had significantly larger receptive vocabularies ( $M = 195.31$ ,  $SD = 94.76$ ),  $t(126) = 6.25$ ,  $p < .001$ ,  $d = 1.10$ , and expressive vocabularies ( $M = 66.78$ ,  $SD = 72.96$ ),  $t(126) = 5.79$ ,  $p < .001$ ,  $d = 1.02$ , compared to 14-month-olds (receptive:  $M = 102.91$ ,  $SD = 70.79$ ; expressive:  $M = 13.05$ ,  $SD = 13.99$ ). For this reason, the vocabulary analyses were conducted separately by Age. Given the differences in category formation between the *Anger-Sad* and *Disgust-Sad* conditions, vocabulary analyses were also conducted separately by Condition. Three difference scores were calculated for infants, representing the difference between their looking time to each of the *novel* test trials relative to the *familiar negative emotion* test trial. Difference scores greater than zero indicate longer looking time to the novel test trial. Correlations were then calculated to examine whether receptive and/or expressive vocabulary scores were related to these difference scores.

In the receptive vocabulary analyses, one 14-month-old in the *Anger-Sad* condition was excluded due to an extremely high vocabulary score ( $+3 SD$  above the

mean). There were no significant correlations for either Age or Condition (see Supplementary Table 2).

In the expressive vocabulary analyses, two 14- and two 18-month-olds (one infant in each condition) were excluded due to extremely high vocabulary scores (+3 *SD* above the mean). For the 14-month-olds in the *Anger-Sad* condition, expressive vocabulary was significantly and negatively related to looking time to the *negative novel face*,  $r = -.38$ ,  $p = .033$ , and the *positive novel emotion*,  $r = -.36$ ,  $p = .045$ . Expressive vocabulary was also marginally negatively related to looking time to the *negative novel emotion*,  $r = -.35$ ,  $p = .055$ . There were no significant correlations for the 18-month-olds (see Supplementary Table 2).

Thus, 14-month-olds with larger expressive vocabularies spent less time looking at the *negative* test events in the *Anger-Sad* condition. This finding seems to be consistent with findings that labels are more likely to facilitate categorization among infants with larger vocabularies (e.g., Waxman & Markow, 1995). However, it is important to note that 14-month-olds also showed shorter looking times to the *positive novel emotion*. Given the relatively small sample sizes used to conduct these correlations ( $n = 32$ ), this finding requires replication.

Supplementary Table 1. Mean looking times (and standard deviations) in seconds during the test trials. Conditions are Anger-Sad (AS) and Disgust-Sad (DS).

| <b>Exp.</b> | <b>Condition</b> | <b>Age</b> | <b><i>n</i></b> | <b>Negative Familiar Event</b> | <b>Negative Novel Face</b> | <b>Negative Novel Emotion</b> | <b>Positive Novel Emotion</b> |
|-------------|------------------|------------|-----------------|--------------------------------|----------------------------|-------------------------------|-------------------------------|
| 1           | AS, DS           | 14         | 48              | 6.54 (3.90)                    | 11.42 (7.74)               | 12.26 (8.57)                  | 15.16 (8.51)                  |
| 1           | AS, DS           | 18         | 48              | 7.46 (4.51)                    | 14.71 (8.04)               | 14.55 (9.09)                  | 17.25 (9.03)                  |
| 1           | DS               | 14         | 24              | 6.10 (2.80)                    | 11.38 (8.12)               | 9.94 (7.16)                   | 13.58 (8.11)                  |
| 2           | DS               | 14         | 32              | 10.68 (5.85)                   | 11.77 (6.92)               | 10.45 (7.03)                  | 19.18 (7.50)                  |
| 2           | DS               | 18         | 32              | 10.76 (6.51)                   | 13.17 (7.69)               | 12.94 (6.96)                  | 17.02 (8.53)                  |
| 2           | AS               | 14, 18     | 48              | 10.00 (6.75)                   | 16.69 (8.98)               | 17.97 (8.79)                  | 18.17 (8.37)                  |
| 2           | DS               | 14, 18     | 48              | 10.46 (6.48)                   | 11.45 (6.31)               | 11.76 (7.11)                  | 17.81 (7.92)                  |

Supplementary Table 2. Correlations between receptive and expressive vocabulary and emotion difference scores in Experiment 2,  $*p < .05$ ,  $^{\wedge}p < .10$ .

|                    | <b>14-month-olds</b> |                   | <b>18-month-olds</b> |            |
|--------------------|----------------------|-------------------|----------------------|------------|
|                    | Receptive            | Expressive        | Receptive            | Expressive |
| <b>Anger-Sad</b>   |                      |                   |                      |            |
| Nov Neg Face       | -.01                 | -.38*             | -.20                 | -.06       |
| Nov Neg Emo        | .13                  | -.35 <sup>^</sup> | -.27                 | -.17       |
| Nov Pos Emo        | .19                  | -.36*             | -.12                 | -.08       |
| <b>Disgust-Sad</b> |                      |                   |                      |            |
| Nov Neg Face       | -.17                 | -.19              | .22                  | .22        |
| Nov Neg Emo        | -.07                 | -.04              | .22                  | .10        |
| Nov Pos Emo        | -.21                 | -.26              | .06                  | -.08       |

Supplementary Figure 1. Experiment 1: Infants' mean total looking time (and SE) during the test trials, \* $p < .05$ , \*\*\* $p < .001$ , + $p < .10$ , for pairwise comparisons between events

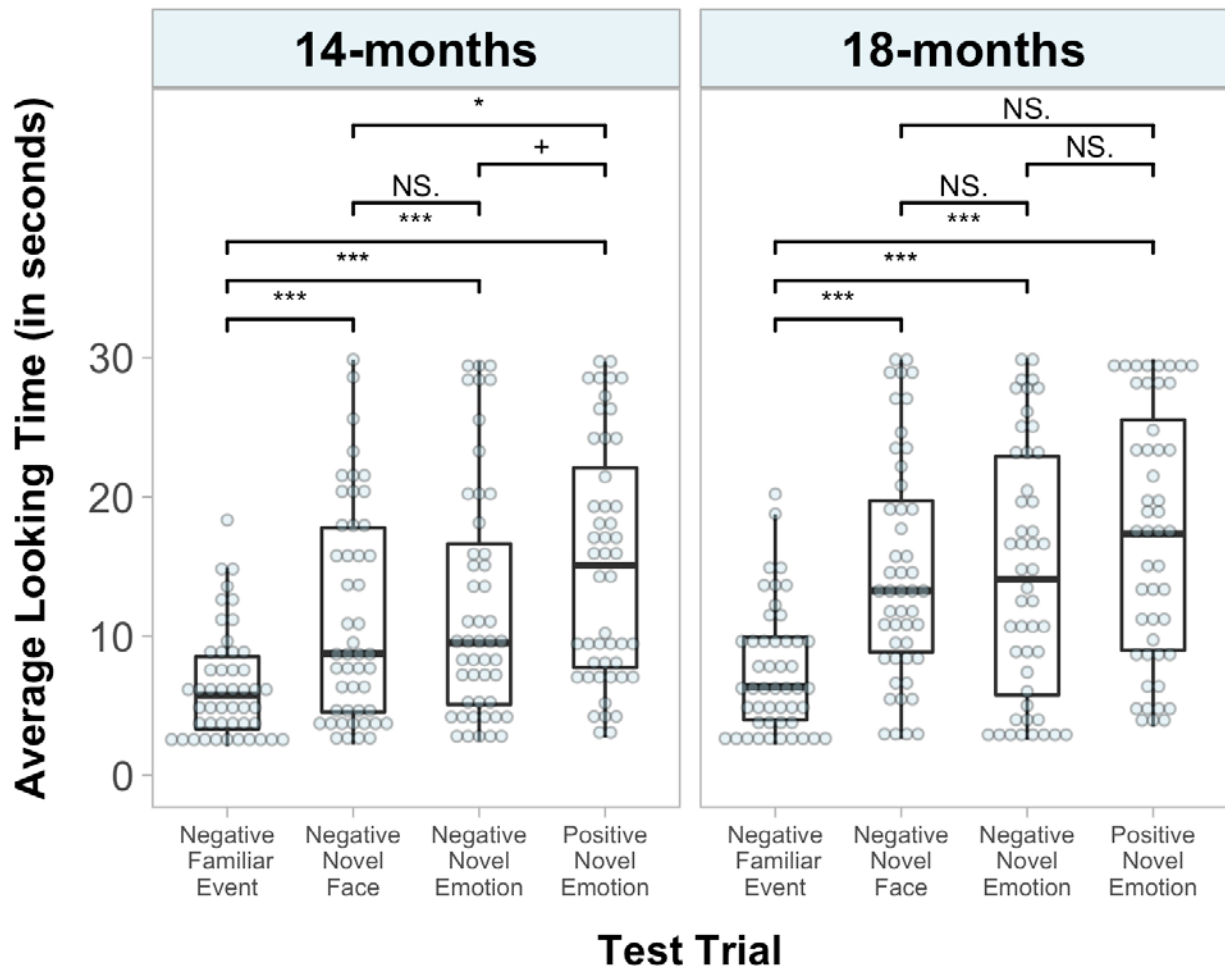



Supplementary Figure 2. Experiment 2: Infants' mean total looking time (and SE) during the test trials in the *Disgust-Sad* condition, \* $p < .05$ , \*\* $p < .01$ , \*\*\* $p < .001$ , for pairwise comparisons between events

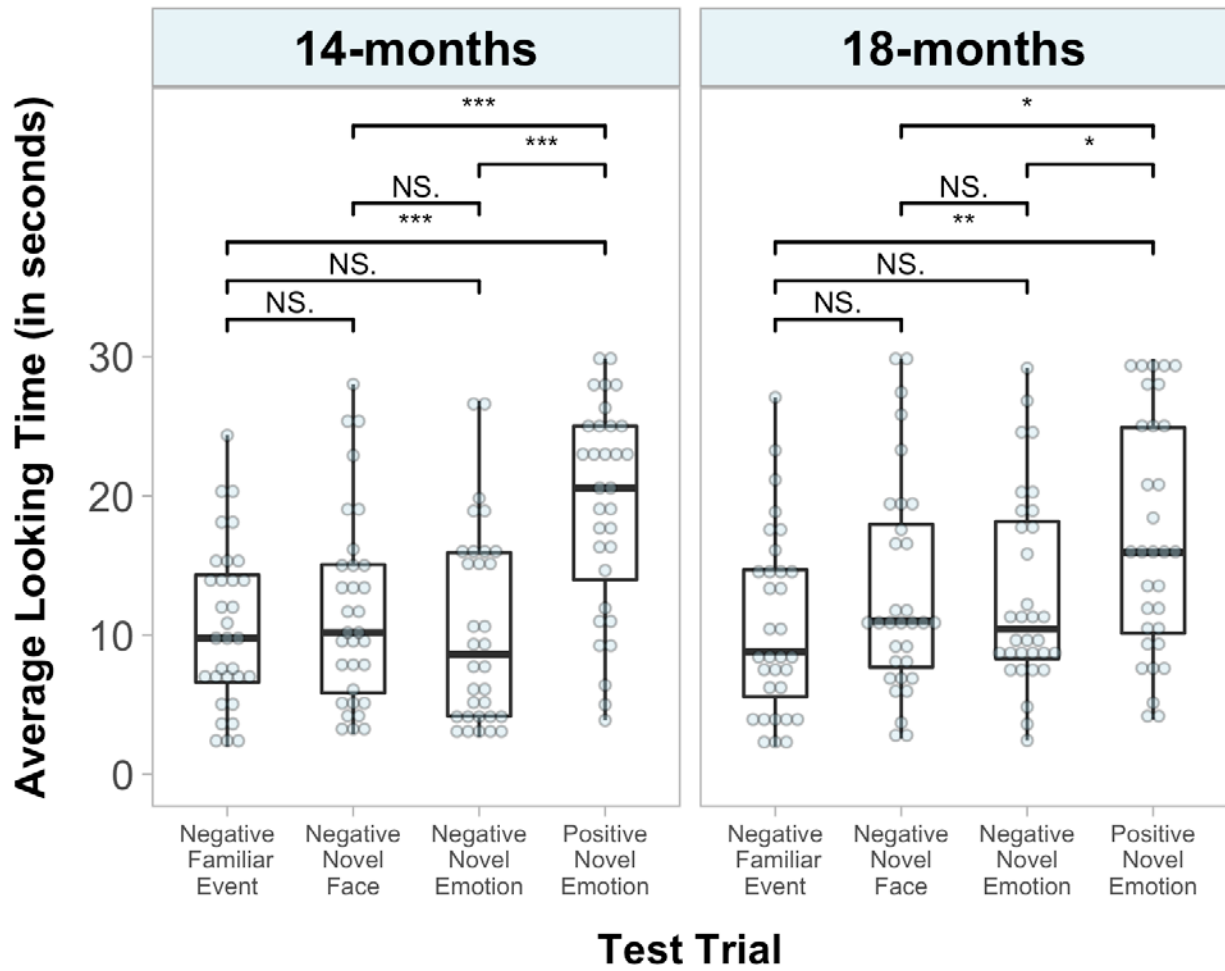

Supplementary Figure 3. Experiment 2: Infants' (first 24 tested per Age and Condition) mean total looking time (and *SE*) during the test trials, \*\*\**p* < .001, for pairwise comparisons between events

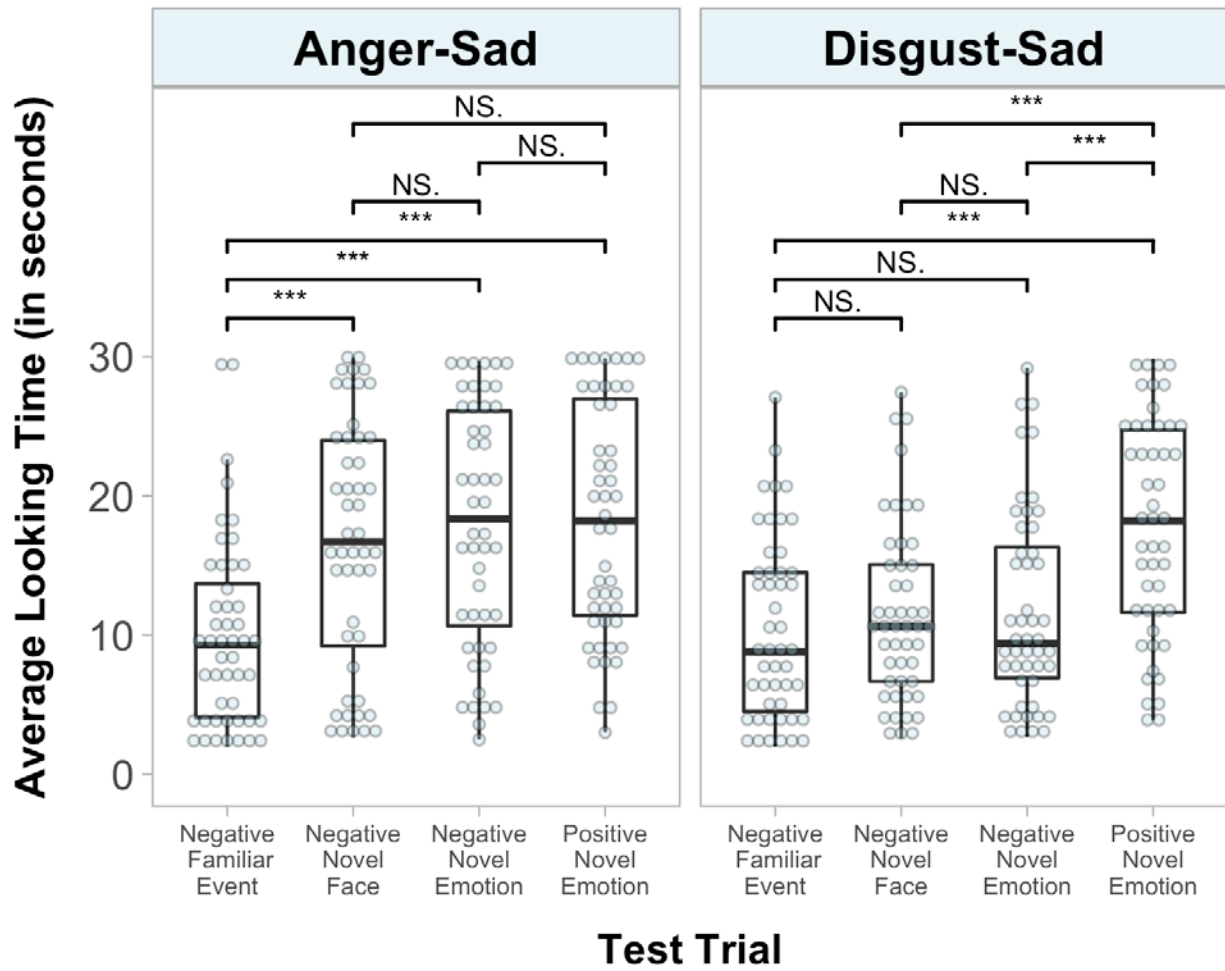

Supplement: NIHMS1065231-supplement-Supplemental_Material.pdf [file NIHMS1065231-supplement-Supplemental_Material.pdf]
